# Supplementary material
Source: MDPI journal article supplement (https://www.mdpi.com/2072-4292/8/9/724)

# Classification scheme for Ostträsket

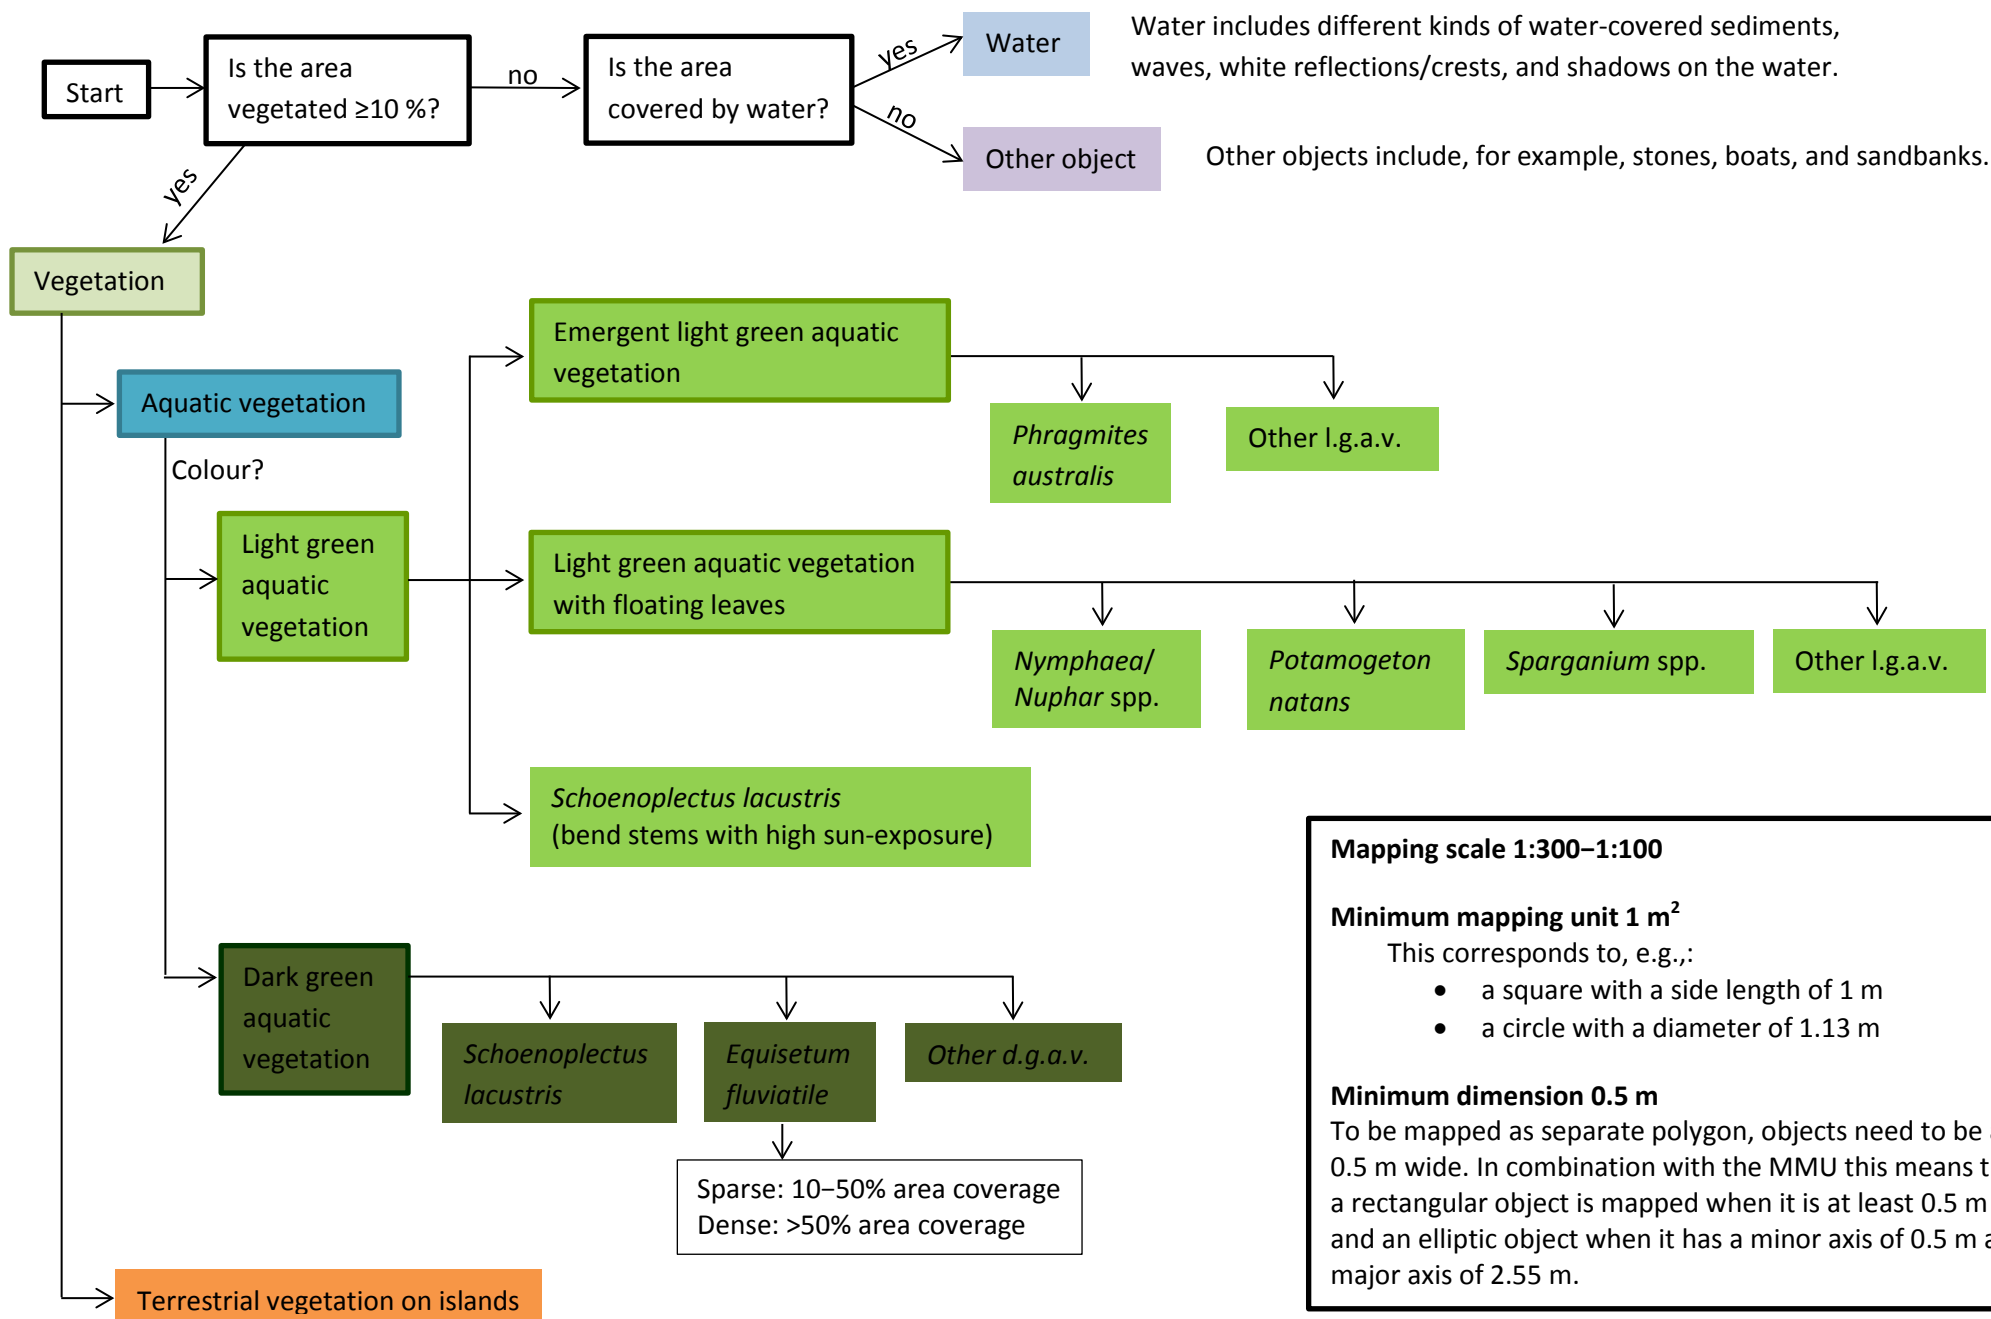

# Mixed classes

---

Areas with more than one taxon are labelled with the name of the dominant taxon. If other taxa cover  $\geq 25\%$  of the vegetated area they are added to the class name in decreasing order of dominance, e.g.:

- *Schoenoplectus lacustris* & *Nymphaea/Nuphar* spp.
- *Phragmites australis* & *Equisetum fluviatile* & *Schoenoplectus lacustris*

If the non-dominant taxon forms clusters which are larger than the MMU each cluster has to form an extra polygon (see examples (a) and (b)).

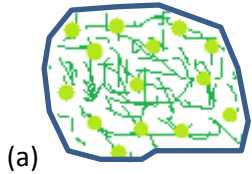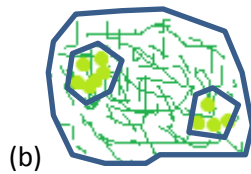

# Examples scale 1:200

---

Water

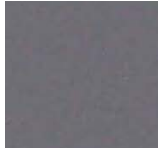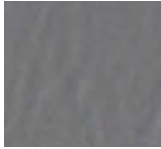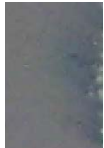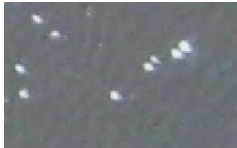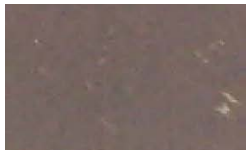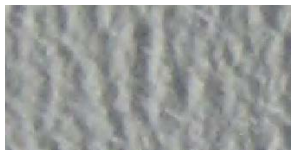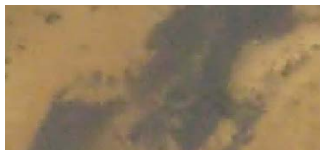

Other objects

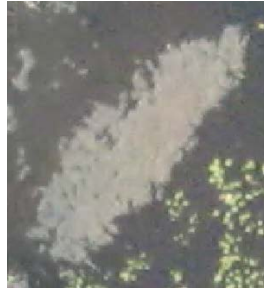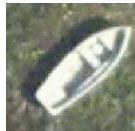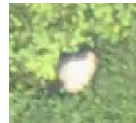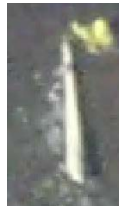

Terrestrial vegetation on islands

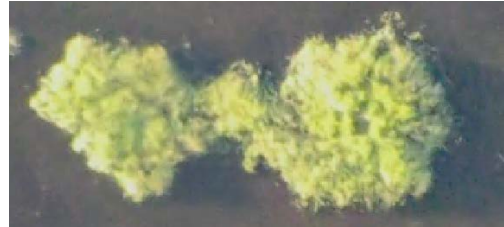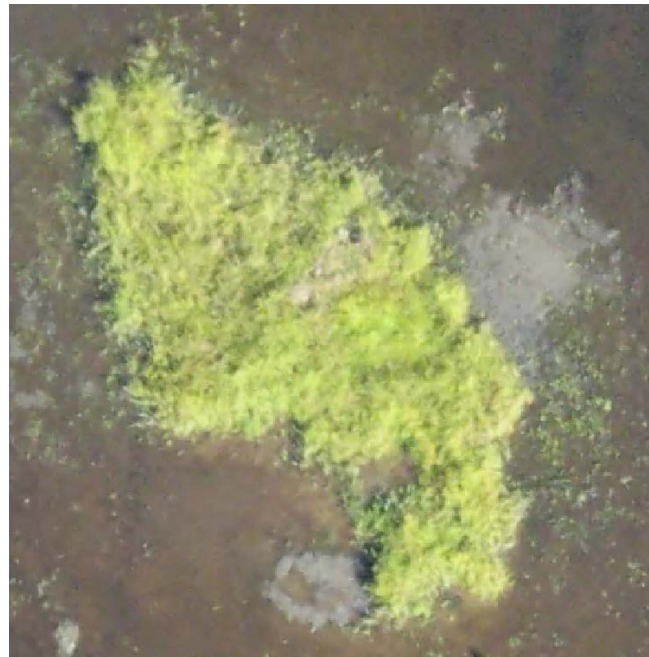

*Nymphaea/Nuphar* spp.

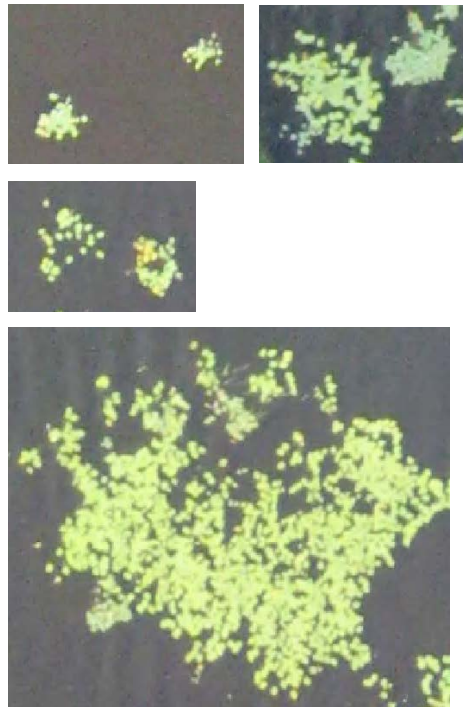

*Potamogeton natans*

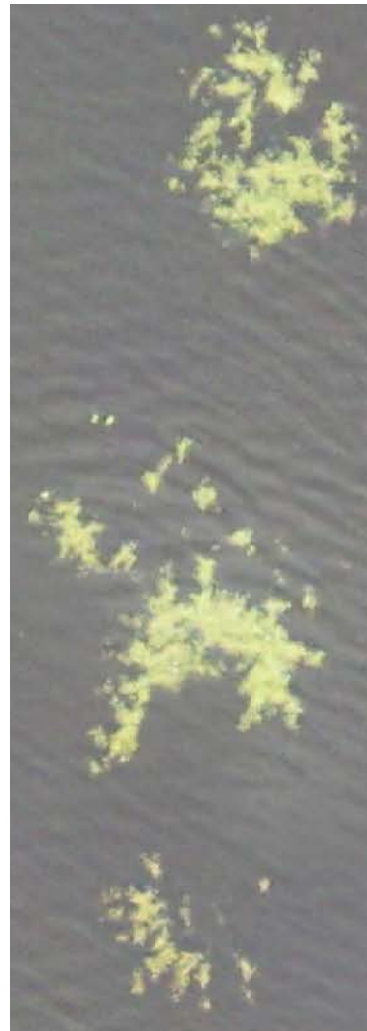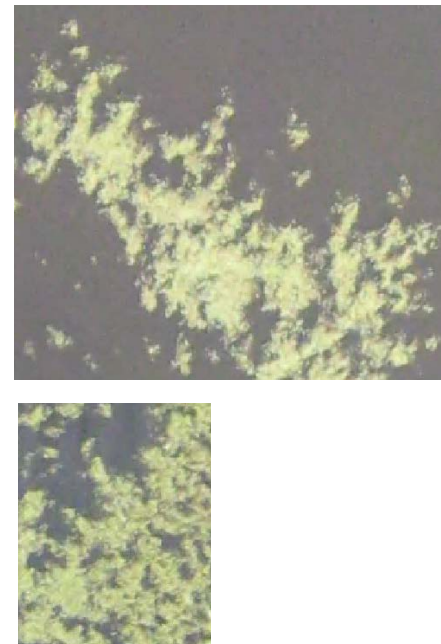

*Sparganium* spp.  
floating form

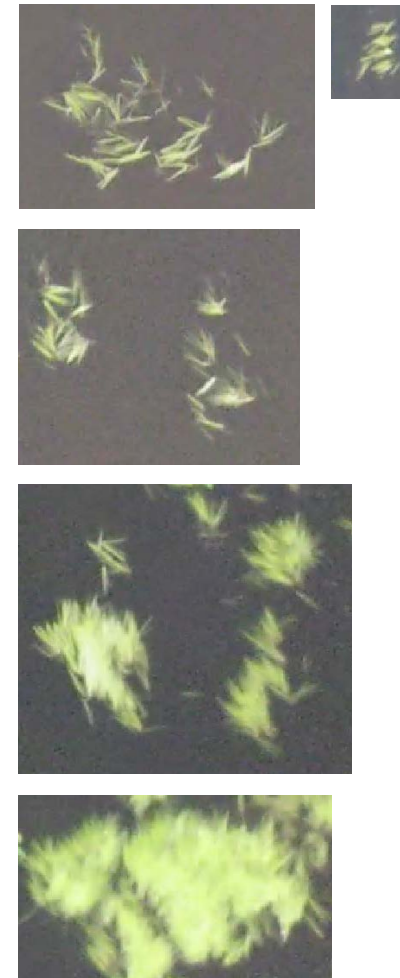



*Phragmites australis*

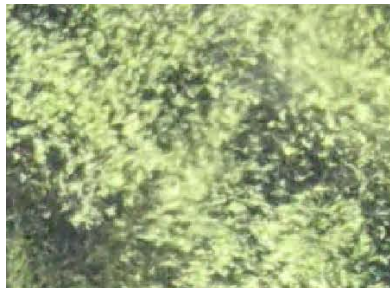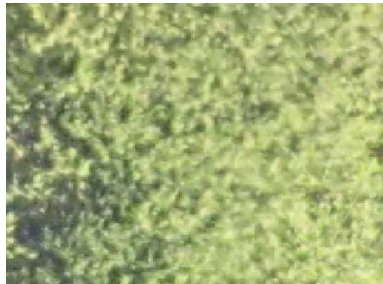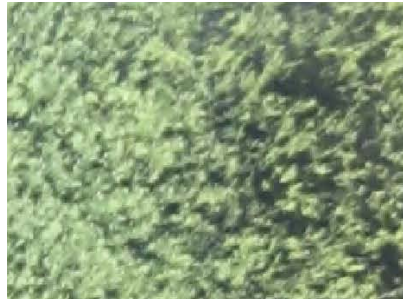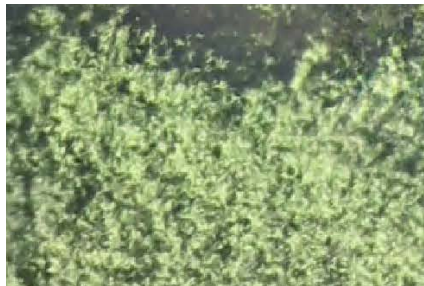

*Schoenoplectus lacustris*

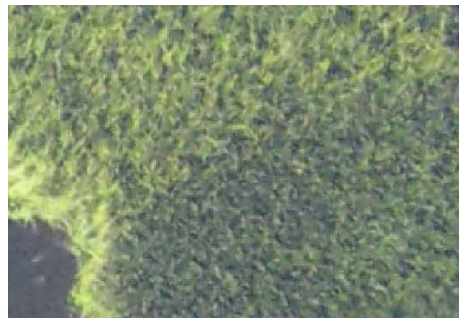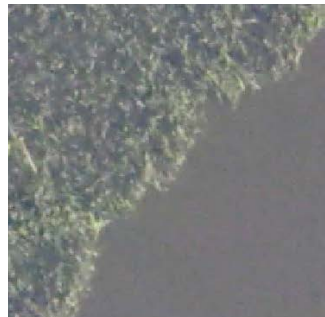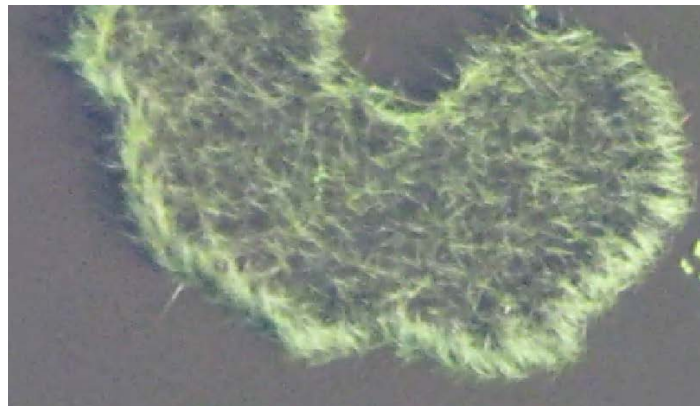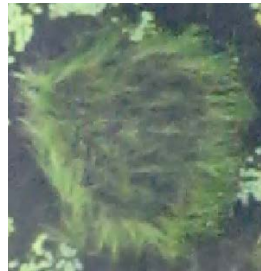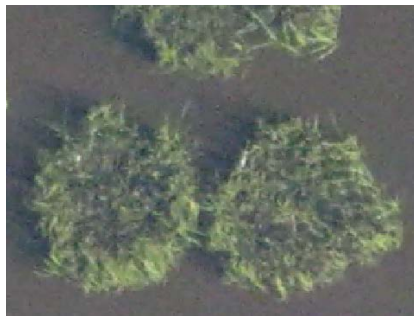

*Equisetum fluviatile*

sparse-dense

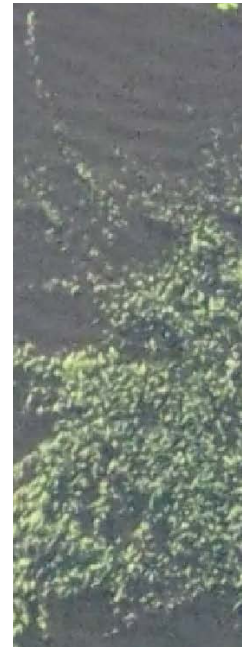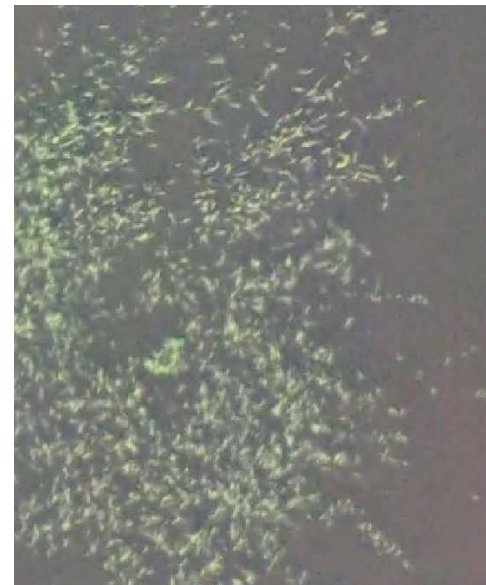

dense, close to the shore

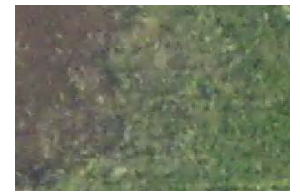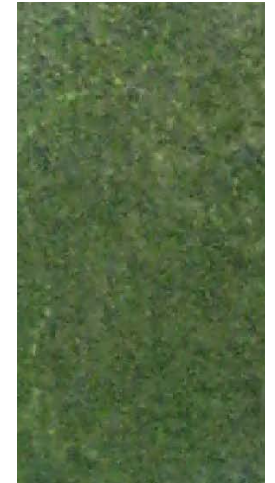

Supplement: s1 [file s1]
